# Supplementary material for: Characterizing the reproductive transcriptomic correlates of acute dehydration in males in the desert-adapted rodent, Peromyscus eremicus
Source: PubMed Central journal article supplement (PMC5481918; doi:10.1186/s12864-017-3840-1), 2017-06-23

# Median

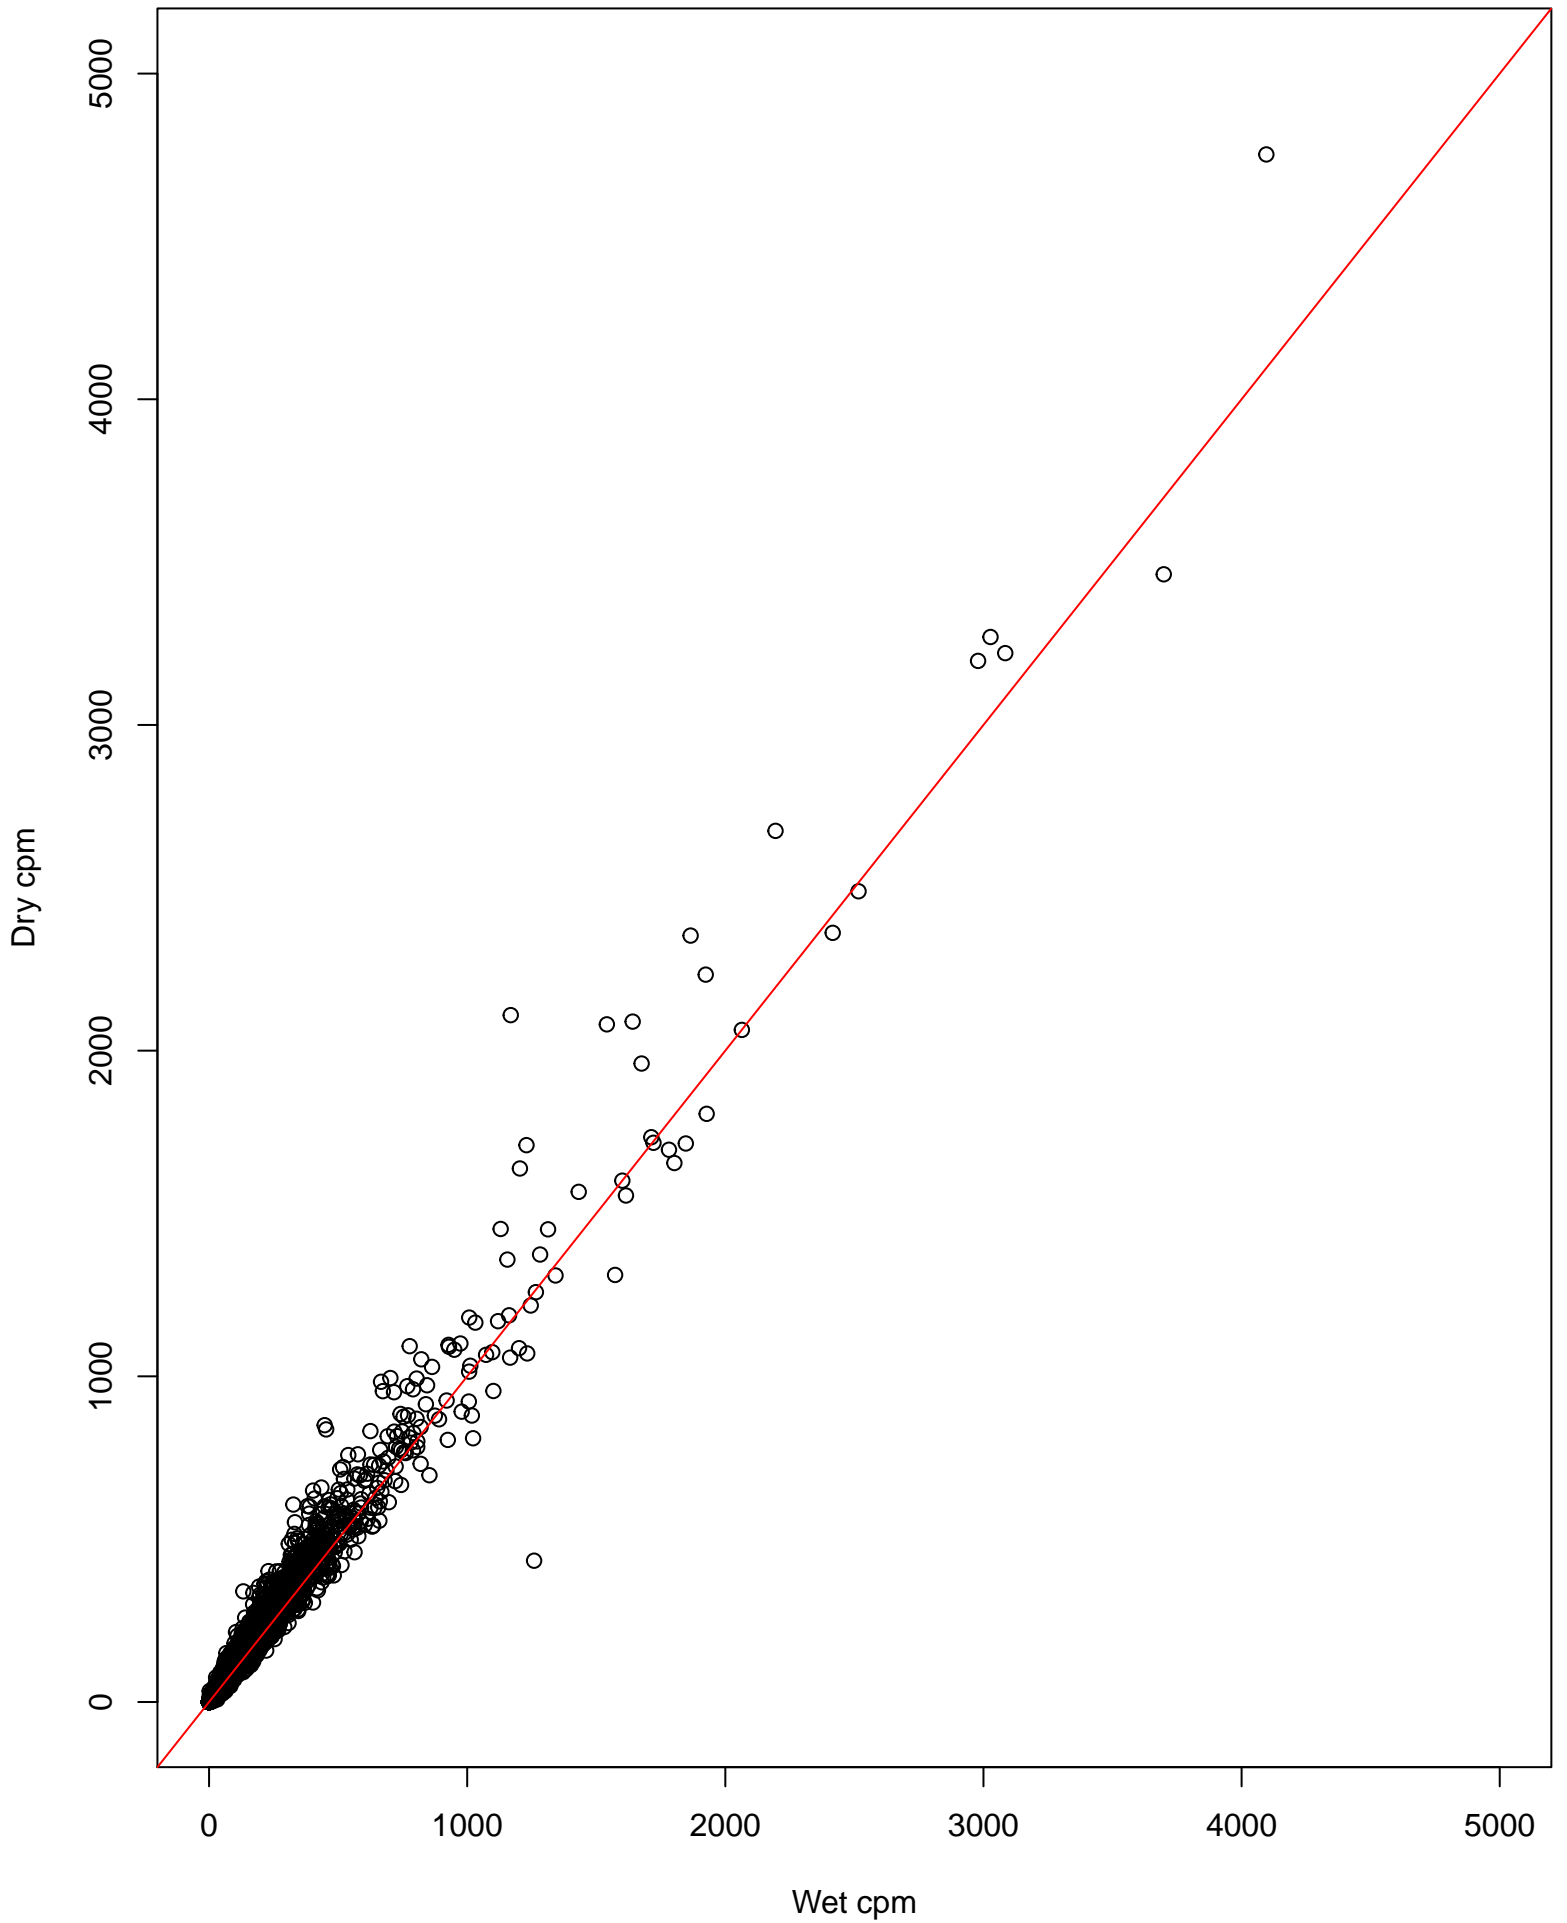

Supplement: 12864_2017_3840_MOESM7_ESM.pdf [file 12864_2017_3840_MOESM7_ESM.pdf]
